# Supplementary material for: The Assessment of Diet Contaminated with Aflatoxin B1 in Juvenile Turbot (Scophthalmus maximus) and the Evaluation of the Efficacy of Mitigation of a Yeast Cell Wall Extract
Source: PubMed Central journal article supplement (PMC7551837; doi:10.3390/toxins12090597), 2020-09-15
Supplement: toxins-12-00597-s001.pdf [file toxins-12-00597-s001.pdf]

# Supplementary Materials: The Assessment of Diet Contaminated with Aflatoxin B<sub>1</sub> in Juvenile Turbot (*Scophthalmus maximus*) and the Evaluation of the Efficacy of Mitigation of a Yeast Cell Wall Extract

Jinzhu Yang, Tiantian Wang, Gang Lin, Mingzhu Li, Ronghua Zhu, Alexandros Yiannikouris, Yanjiao Zhang and Kangsen Mai

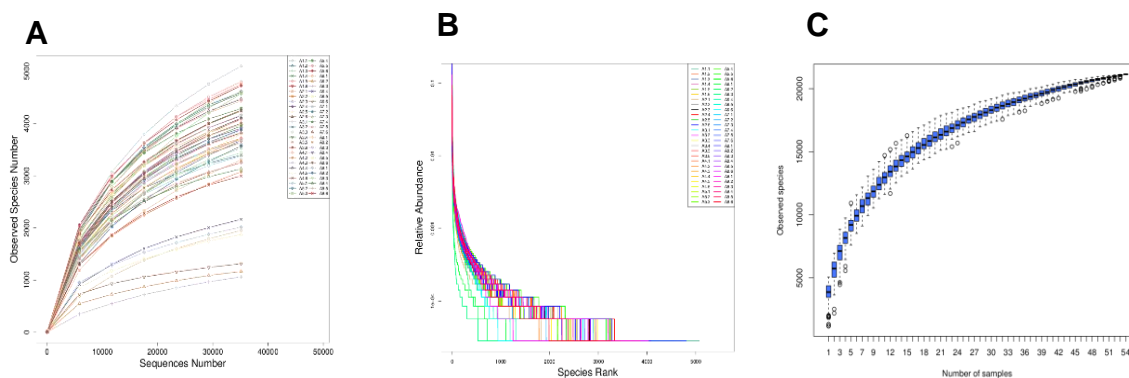

**Figure S1.** Rarefaction curves (A), Rank abundance (B) and Species accumulation boxplot (C) for all the intestinal microbiota samples.

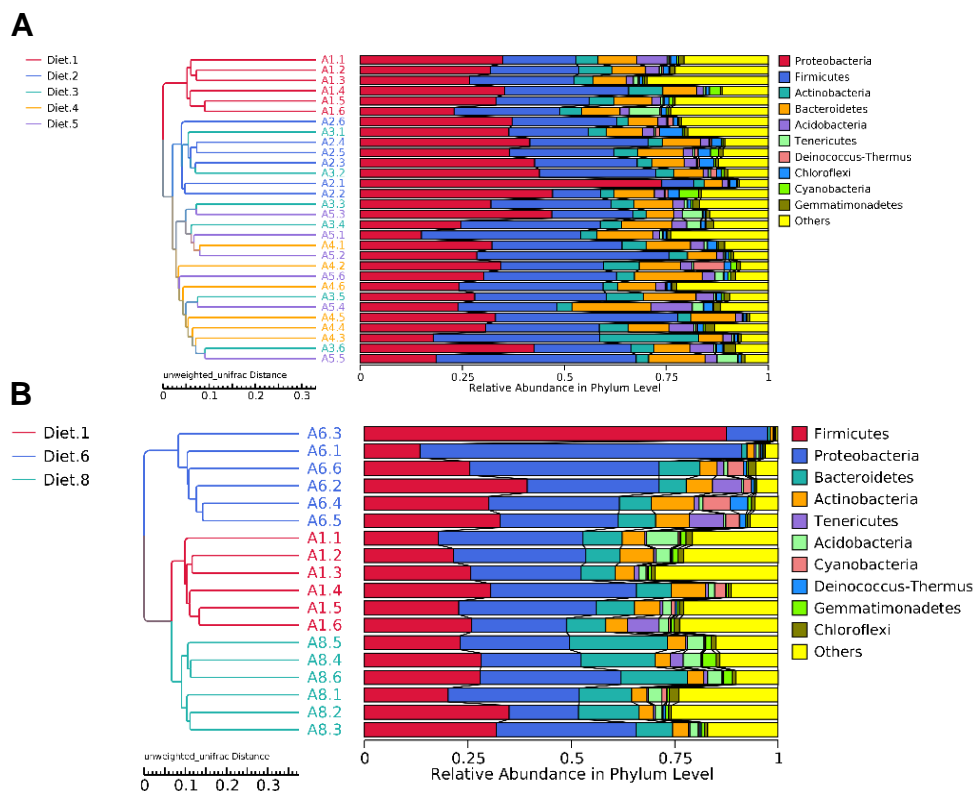

**Figure S2.** UPGMA clustering trees in samples (A and B) based on Unweighted Unifrac distances between Diet 1–5 or Diet 1, 6 and 8.

**Table S1.** MRPP test and Adonis test of the Diet 1–5 groups' microbial community structure of turbot.

\*.

| Group         | MRPP  |              | Adonis   |
|---------------|-------|--------------|----------|
|               | A     | Significance | <i>p</i> |
| Diet.1-Diet.2 | 0.187 | 0.001        | 0.002    |
| Diet.1-Diet.3 | 0.062 | 0.002        | 0.003    |
| Diet.1-Diet.4 | 0.068 | 0.002        | 0.002    |
| Diet.1-Diet.5 | 0.078 | 0.001        | 0.007    |
| Diet.2-Diet.3 | 0.123 | 0.002        | 0.002    |
| Diet.2-Diet.4 | 0.152 | 0.005        | 0.006    |
| Diet.2-Diet.5 | 0.124 | 0.004        | 0.003    |
| Diet.3-Diet.4 | 0.004 | 0.317        | 0.547    |
| Diet.3-Diet.5 | 0.015 | 0.082        | 0.219    |
| Diet.4-Diet.5 | 0.019 | 0.040        | 0.282    |

\* Values represent are means  $\pm$  S.E. of 3 replicate tanks. A value greater than zero indicates that the difference between groups is greater than that within groups; significance value smaller than 0.05 indicates significant difference. Adonis test was calculated based on Unweighted Unifrac distances. *p*-value smaller than 0.05 indicates significant difference.

**Table S2.** MRPP test and Adonis test of the Diet 1, 6 and 8 groups' microbial community structure of turbot. \*.

| Group         | MRPP  |              | Adonis   |
|---------------|-------|--------------|----------|
|               | A     | Significance | <i>p</i> |
| Diet.1-Diet.6 | 0.152 | 0.004        | 0.002    |
| Diet.1-Diet.8 | 0.092 | 0.001        | 0.003    |
| Diet.6-Diet.8 | 0.152 | 0.002        | 0.001    |

\* Values represent are means  $\pm$  S.E. of 3 replicate tanks. A value greater than zero indicates that the difference between groups is greater than that within groups; significance value smaller than 0.05 indicates significant difference. Adonis test was calculated based on Unweighted Unifrac distances. *p*-value smaller than 0.05 indicates significant difference.

**Table S3.** Primer sequences, efficiency, amplicon size, annealing temperature and function for the genes profiled in real-time PCR.

| Gene           | GenBank<br>Accession no. | Primer Sequence (5'-3') |                       | Amplicon<br>Size (bp) | Annealing<br>Temp. (°C) | Amplification<br>Efficiency (%) |
|----------------|--------------------------|-------------------------|-----------------------|-----------------------|-------------------------|---------------------------------|
|                |                          | Forward                 | Reverse               |                       |                         |                                 |
| CAT            | MG253621.1               | GGTTTGCCCTGATGGCTTTTCG  | AAAAGGTCCAGGATGGGCAG  | 229                   | 60                      | 99                              |
| SOD            | AWO99752.1               | AAACAATCTGCCAAACCTCTG   | CAGGAGAACAGTAAAGCATGG | 165                   | 60                      | 99                              |
| GPx            | AWP04239.1               | GGACAAGTGGTGAAGCGGTA    | TAAAGGTACGTGGGCAGGTC  | 74                    | 60                      | 100                             |
| p53            | EU711045.1               | CAAAGAGGCAGAGTGTGACC    | TGACATGAAGCTCAGCAG    | 85                    | 60                      | 101                             |
| CYP1A          | AJ310694.1               | CAGCAAACCCTACCTGAGTC    | CTTGCTTGATGAGAGCCTGT  | 131                   | 60                      | 103                             |
| CYP3A          | JN216889.1               | ATGAAGCCCTGATGCAGATG    | CCTGGGGATTATCACACCG   | 132                   | 60                      | 104                             |
| GST- $\zeta_1$ | DQ848966.1               | GTCATTGCCTCTGGGATACAG   | TCAAGAGCTGTGAAACCACG  | 113                   | 60                      | 100                             |
| $\beta$ -actin | EU686692.1               | CGTGCGTGACATCAAGGAG     | AGGAAGGAAGGCTGGAAGAG  | 177                   | 60                      | 98                              |

Gene full names: catalase (CAT); superoxide dismutase (SOD); glutathione peroxidase (GPx); tumor suppressor protein p53 (p53); cytochrome p450 1A (CYP1A); cytochrome p450 3A (CYP3A); glutathione-S-transferase zeta-1 (GST- $\zeta_1$ ).
